# Supplementary material for: Natural Differences between the Dawn and Dusk Choruses of a Neotropical Songbird and Their Relationship to Its Response to Urbanization
Source: Preprints.org preprint supplement (doi:10.20944/preprints202401.0855.v1), 2024-01-11
Supplement: Supplementary file 1 [file supplementary]

***SUPPLEMENTARY MATERIAL***

**Table 1.** Specific information for each study plot with the parameters of the tracks recorded in each period of the day per plot (a.m. = morning; p.m. = afternoon).

| **Plot Code** | **Plot Name (mean dB*)**  **(Central point coordinates)** | **Period of the day** | **Number of males of Chiguanco Thrush recorded** | **Total songs recorded** | **Total songs analyzed** |
| --- | --- | --- | --- | --- | --- |
| U1 | San Pedro (75 dB) | a.m. | 13 | 297 | 51 |
|  | (-16.502466; -68.135261) | p.m. | 12 | 175 | 39 |
| U2 | Sopocachi (70 dB) | a.m. | 18 | 419 | 33 |
|  | (-16.514340; -68.128479) | p.m. | 16 | 170 | 19 |
| U3 | Miraflores (75 dB) | a.m. | 15 | 216 | 29 |
|  | (-16.499655; -68.121093) | p.m. | 17 | 145 | 28 |
| E1 | Auquisamaña (55 dB) | a.m. | 14 | 627 | 54 |
|  | (-16.554830; -68.071654) | p.m. | 14 | 419 | 29 |
| E2 | Achumani (50 dB) | a.m. | 18 | 903 | 57 |
|  | (-16.510743; -68.047747) | p.m. | 16 | 397 | 28 |
| E3 | Cota Cota (60 dB) | a.m. | 17 | 982 | 51 |
|  | (-16.538624; -68.069034) | p.m. | 17 | 320 | 16 |

(*) Information obtained from the isophonic curves constructed with the mean values of measurements obtained between 08:00 and 20:00 in the city of La Paz [52].

**Table 2.** Spearman’s rank correlation values and *p*-value (in parenthesis), for pair-to-pair comparisons of the environmental sound pressure (EPS) and the Chiguanco Thrush song variables: song sound pressure (SSP), minimum song frequency (Min. F.), maximum song frequency (Max. F.), frequency range (F. Range) and dominant song frequency (Dom. F), for the urban zone in the upper diagonal and for the extra-urban zone in the lower diagonal of the city of La Paz.

|  | **ESP** | **SSP** | **Min. F.** | **Max. F.** | **F. Range** | **Dom. F.** |
| --- | --- | --- | --- | --- | --- | --- |
| **ESP** |  | 0.040  (= 0.577) | 0.035  (= 0.619) | - 0.061  (= 0.395) | - 0.061  (= 0.390) | 0.021  (= 0.801) |
| **SSP** | - 0.379  (< 0.001) |  | - 0.220  (= 0.002) | 0.279  (< 0.001) | 0.315  (< 0.001) | 0.007  (= 0.934) |
| **Min. F** | 0.370  (< 0.001) | - 0.303  (< 0.001) |  | - 0.132  (= 0.062) | - 0.324  (< 0.001) | - 0.042  (= 0.621) |
| **Max. F** | - 0.268  (< 0.001) | 0.425  (< 0.001) | - 0.207  (= 0.001) |  | 0.973  (< 0.001) | - 0.025  (= 0.770) |
| **F. Range** | - 0.312  (< 0.001) | 0.454  (< 0.001) | - 0.391  (< 0.001) | 0.974  (< 0.001) |  | - 0.014  (= 0.865) |
| **Dom. F.** | 0.135  (= 0.057) | 0.066  (= 0.356) | 0.115  (= 0.106) | 0.034  (= 0.630) | 0.001  (= 0.991) |  |
